# Supplementary material for: Exceptional metal–semiconductor–metal transition of lead apatites via oxygen defect tuning
Source: Royal Society of Chemistry journal article supplement (doi:10.1039/d3cp04984a), 2023-12-21
Supplement: d3cp04984a1.pdf [file d3cp04984a1.pdf]

## Exceptional Metal-Semiconductor-Metal Transition of Lead Apatite via Oxygen Defect Tuning

Zhijing Huang<sup>1</sup>, Xiaojian Ni<sup>2</sup>, Hao Huang<sup>3</sup>, Yusong Tu<sup>1\*</sup>, Zonglin Gu<sup>1\*</sup>, Shuming Zeng<sup>1\*</sup>

<sup>1</sup>College of Physical Science and Technology, Yangzhou University, Jiangsu, 225009, China

<sup>2</sup>School of Mechanical and Electrical Engineering, Wuzhou Vocational College, Guangxi, 543000,  
China

<sup>3</sup>Advanced Copper Industry College, Jiangxi University of Science and Technology, Yingtan  
335000, China

\*Corresponding authors: zengsm@yzu.edu.cn (Shuming Zeng), guzonglin@yzu.edu.cn (Zonglin  
Gu), ystu@yzu.edu.cn (Yusong Tu).

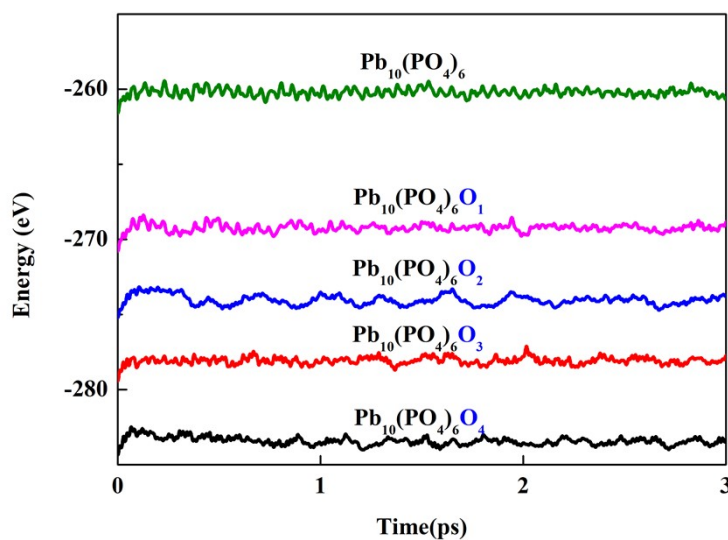

FIG. S1. The AIMD simulations at 300 K for  $\text{Pb}_{10}(\text{PO}_4)\text{O}_y$ .

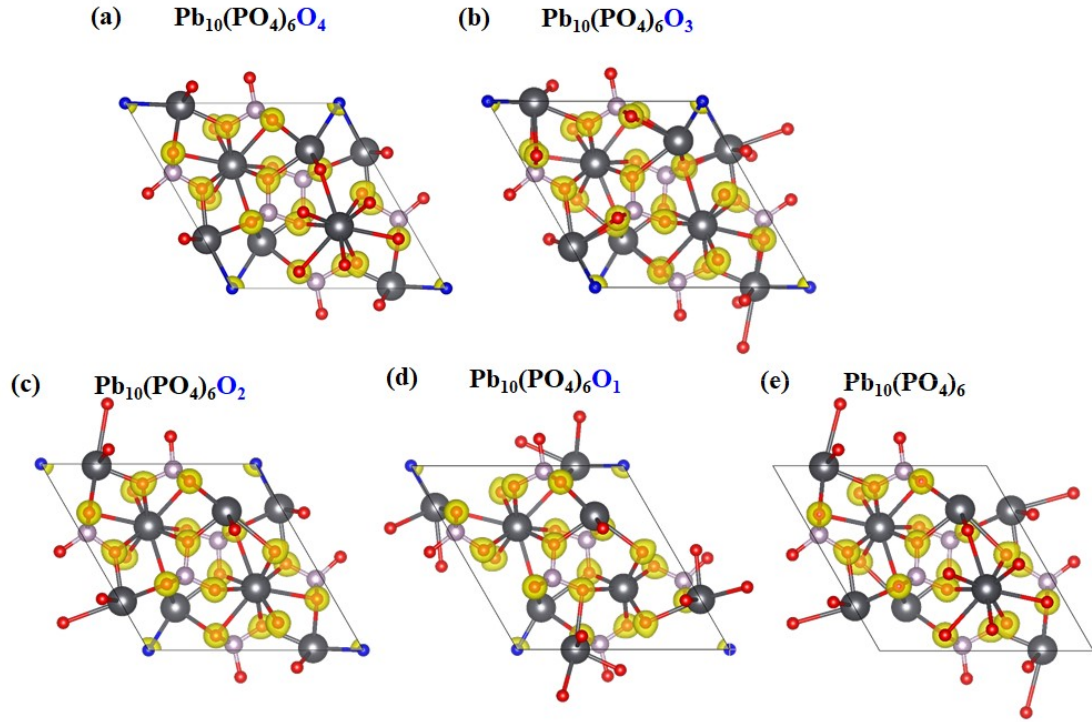

FIG. S2. (a-e) The charge density distribution of  $\text{Pb}_{10}(\text{PO}_x)_6\text{O}_y$  structures, where  $x = 4$  and  $y = 0-4$ .

The O atoms can be classified into two categories: O (blue sphere) and O (red sphere).

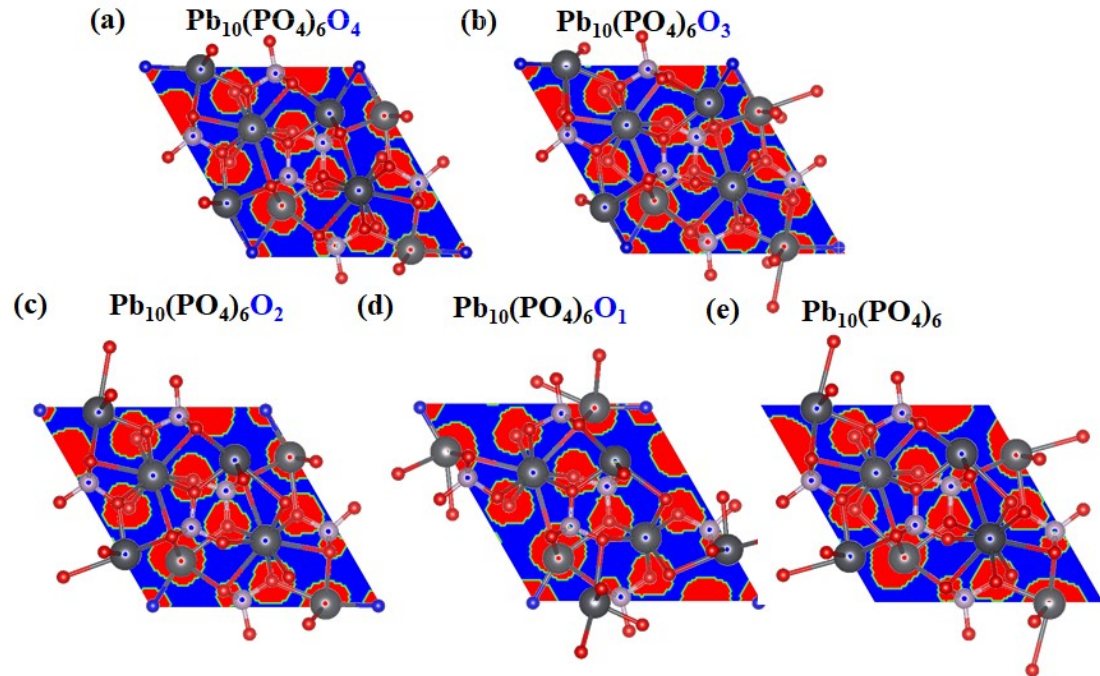

FIG. S3. (a-e) The electron localization function (ELF) of  $\text{Pb}_{10}(\text{PO}_x)_6\text{O}_y$  structures, where  $x = 4$  and  $y = 0-4$ .

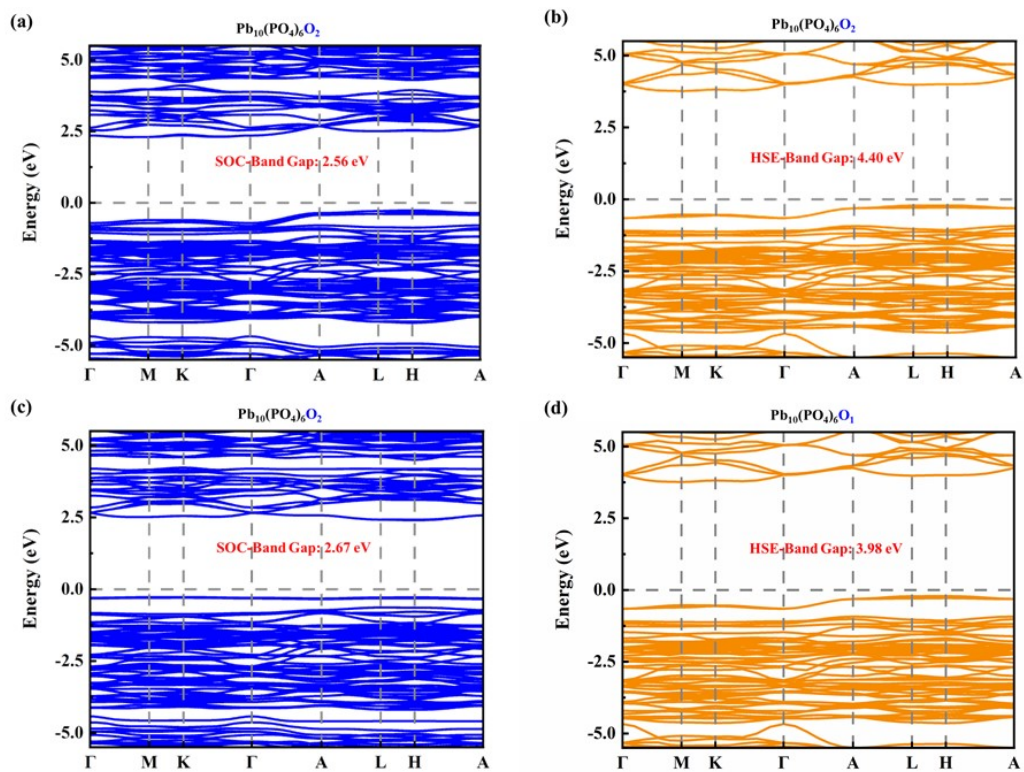

FIG. S4. The band structures of (a-b)  $\text{Pb}_{10}(\text{PO}_4)_6\text{O}_2$  and (c-d)  $\text{Pb}_{10}(\text{PO}_4)_6\text{O}_1$  using PBE+SOC and HSE functional.

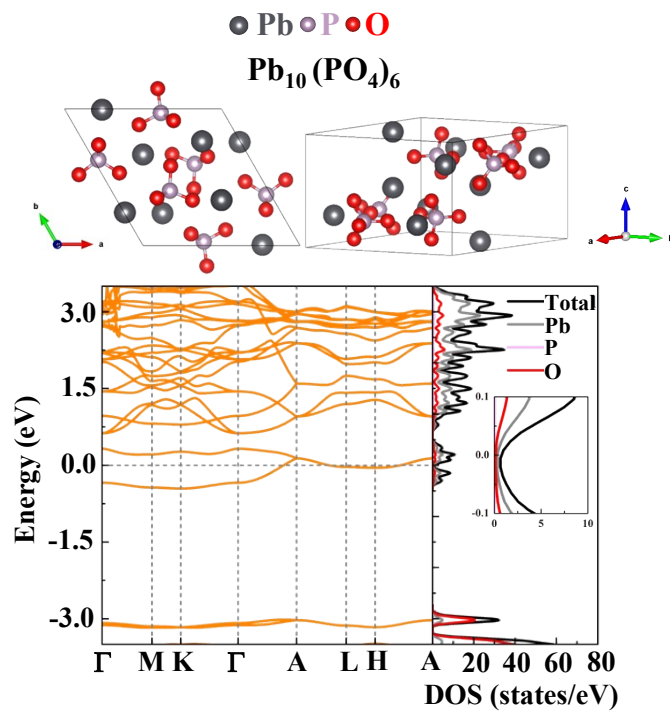

**FIG. S5.** Optimized top and side views of  $\text{Pb}_{10}(\text{PO}_4)_6$  structures. The corresponding band structures and density of states for these structures are presented below each configurations, respectively. Insets show an amplification of the density of states contributions from various elements near the Fermi level. The lattice parameter of  $\text{Pb}_{10}(\text{PO}_4)_6$  structure are shown in Table 1.

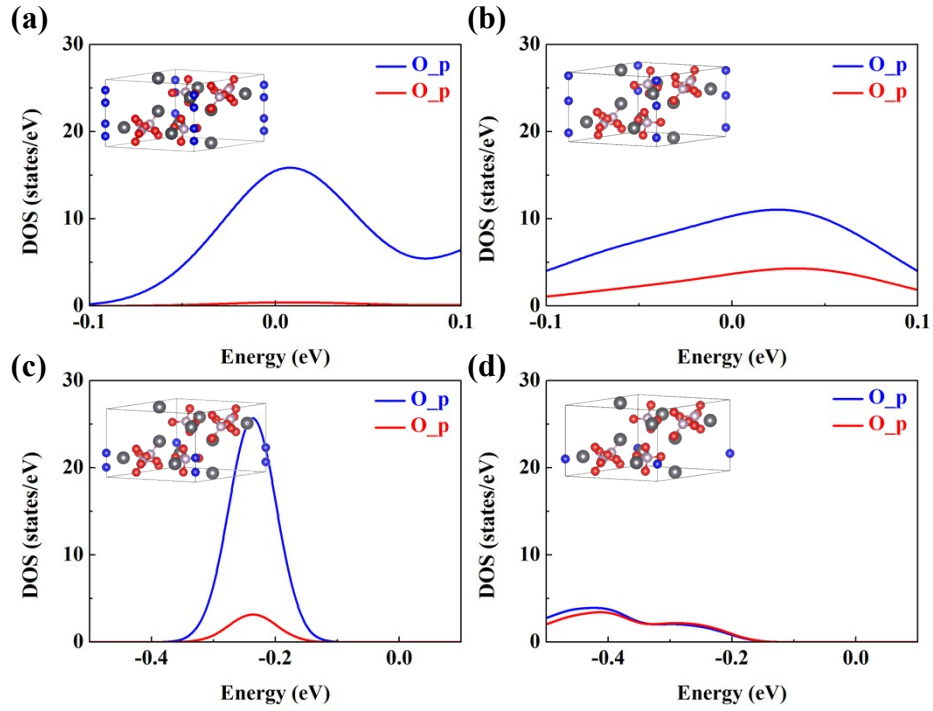

**FIG. S6.** (a-d) Partial density of states for  $\text{Pb}_{10}(\text{PO}_4)_6\text{O}_y$  ( $y=1-4$ ). The blue and red lines correspond to the  $p$  orbitals of the electronic states for isolated oxygen atoms (blue spheres) and oxygen atoms (red spheres) in  $\text{PO}_4$  groups, respectively. The position of the Fermi level is marked at 0 eV.

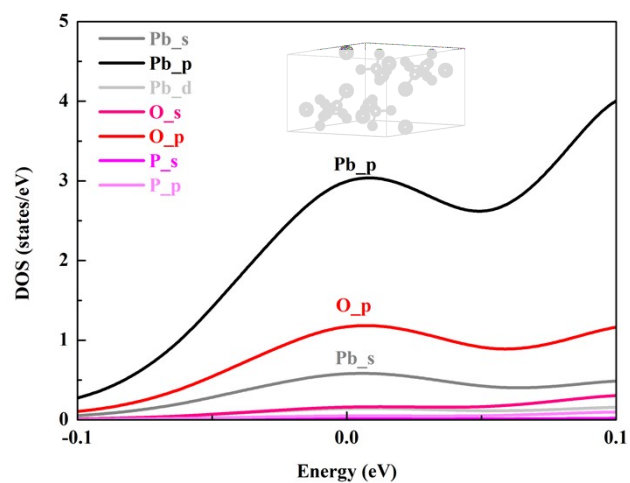

**FIG. S7.** Partial density of states for  $\text{Pb}_{10}(\text{PO}_4)_6$ . The position of the Fermi level is marked at 0 eV.

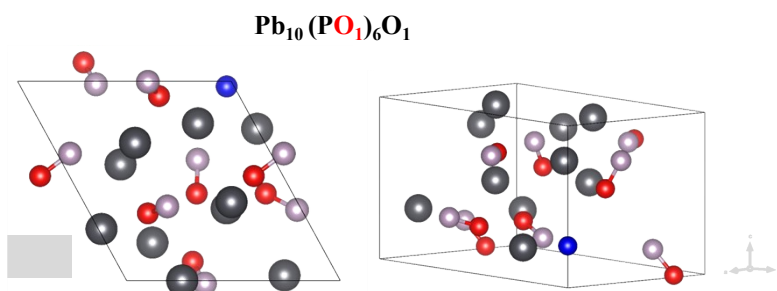

**FIG. S8.** Top and side views of  $\text{Pb}_{10}(\text{PO}_4)_6\text{O}_1$  structures after undergoing 1000 optimization steps.

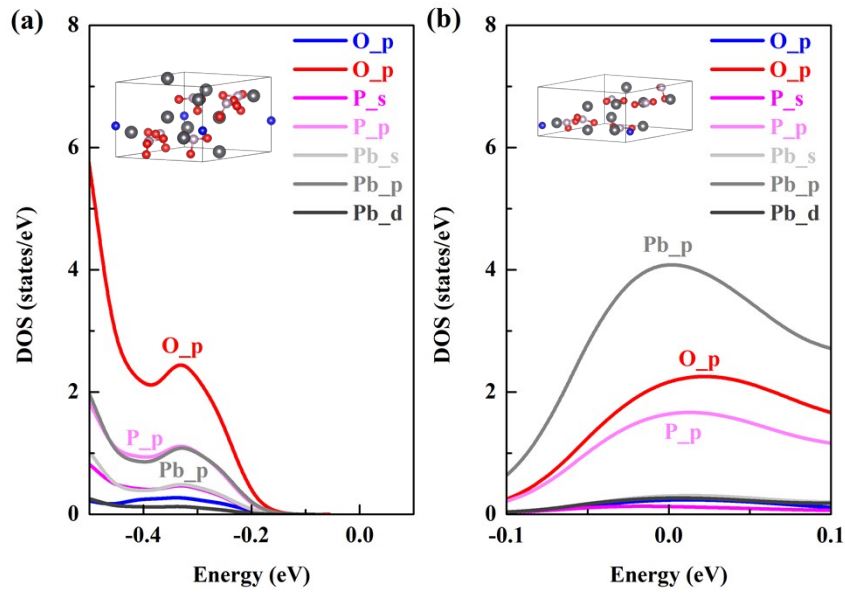

FIG. S9. (a-b) Partial density of states for  $\text{Pb}_{10}(\text{PO}_3)_6\text{O}_1$  and  $\text{Pb}_{10}(\text{PO}_2)_6\text{O}_1$ . The position of the Fermi level is marked at 0 eV.

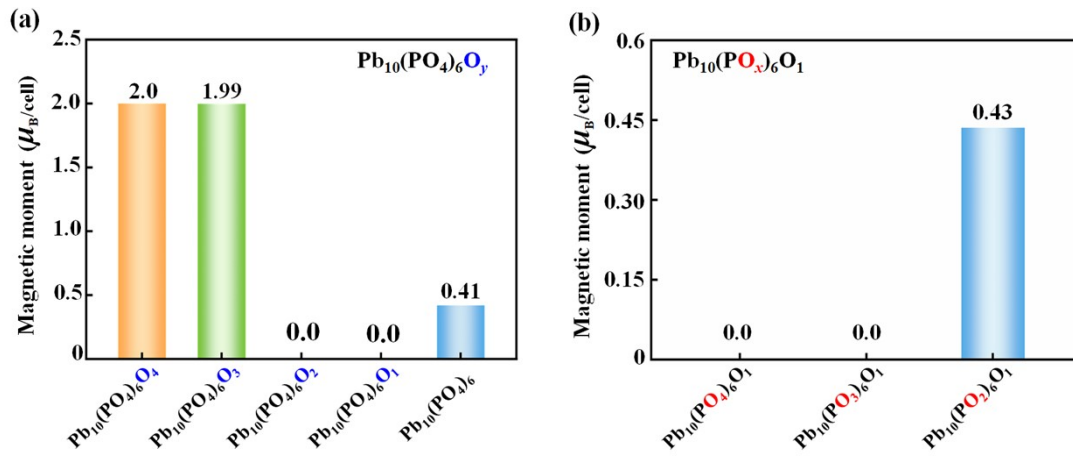

FIG. S10. The magnetic moment of  $\text{Pb}_{10}(\text{PO}_x)_6\text{O}_y$  structures with various (a)  $\text{O}_y$  defects and (b)  $\text{O}_x$  defects.

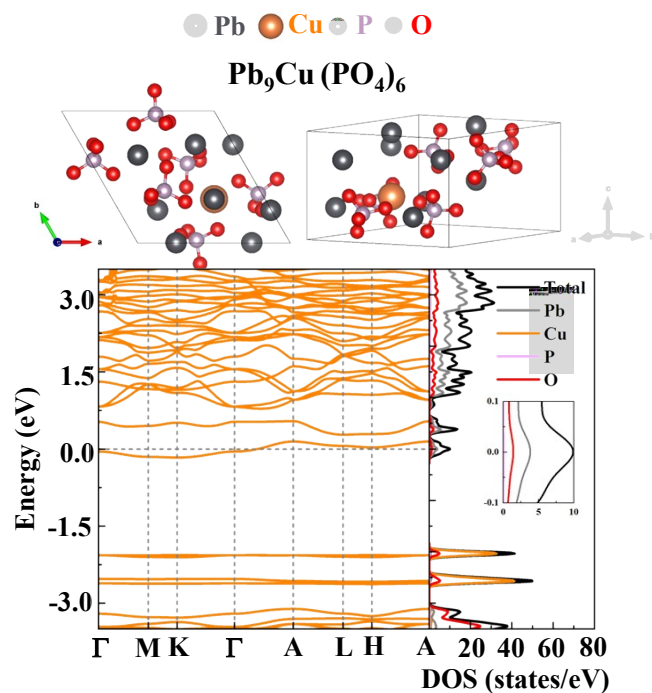

**FIG. S11. (a-d)** Optimized top and side views of  $\text{Pb}_9\text{Cu}(\text{PO}_4)_6$  structures. The Cu atom locate at site 1. The corresponding band structures and density of states for th structures are presented below the configurations. Insets show an amplification of the density of states contributions from various elements near the Fermi level. The lattice parameter of  $\text{Pb}_9\text{Cu}(\text{PO}_4)_6$  structure are shown in Table S1.

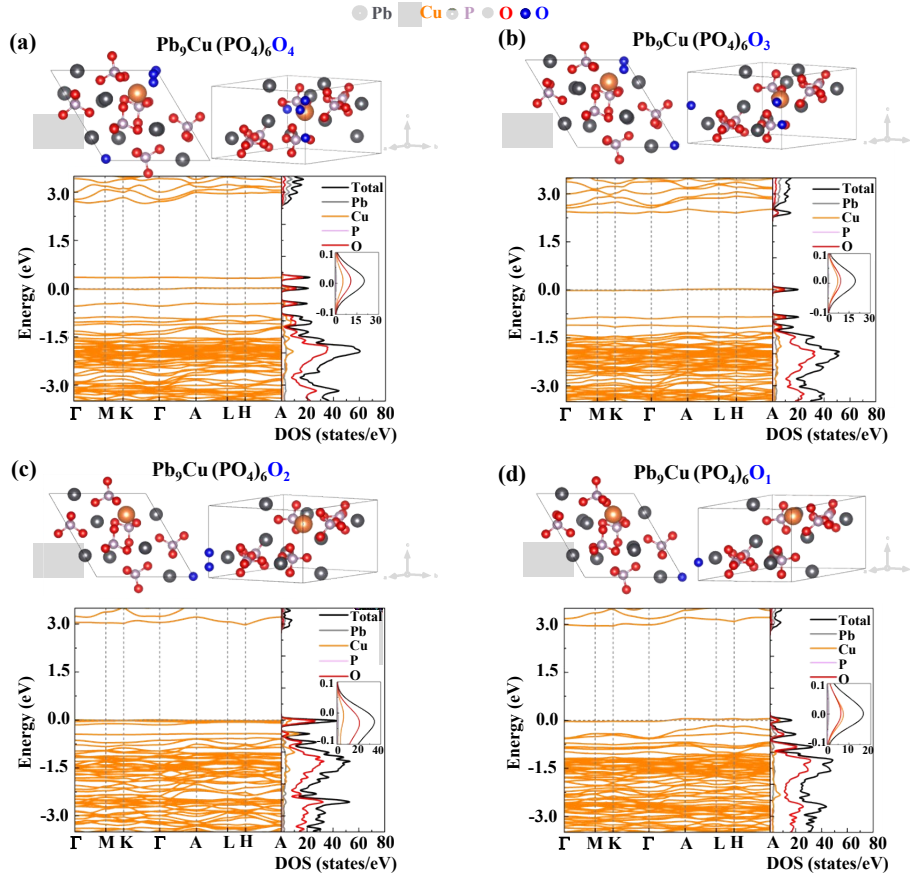

**FIG. S12.** (a-d) Top and side views of optimized  $\text{Pb}_9\text{Cu}(\text{PO}_x)_6\text{O}_y$  structures, where  $x=4$  and  $y=1-4$ . The Cu atoms locate at site 2 and O atoms can be classified into two categories: O (blue sphere) and O (red sphere). The corresponding band structures and DOS for these structures are presented below each configuration. Insets show an amplification of the DOS contribution from various elements near the Fermi level. The lattice parameters of  $\text{Pb}_9\text{Cu}(\text{PO}_x)_6\text{O}_y$  structures are shown in Table S2.



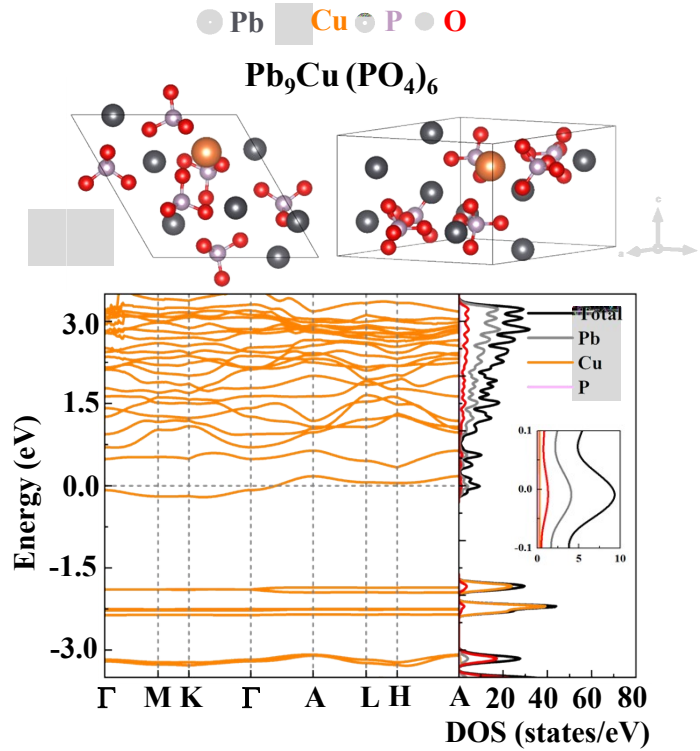

**FIG. S13.** (a-d) Optimized top and side views of  $\text{Pb}_9\text{Cu}(\text{PO}_4)_6$  structures. The Cu atom locate at site 2. The corresponding band structures and density of states for the structure are presented below the configurations. Insets show an amplification of the density of states contributions from various elements near the Fermi level. The lattice parameter of  $\text{Pb}_9\text{Cu}(\text{PO}_4)_6$  structure are shown in Table S2.

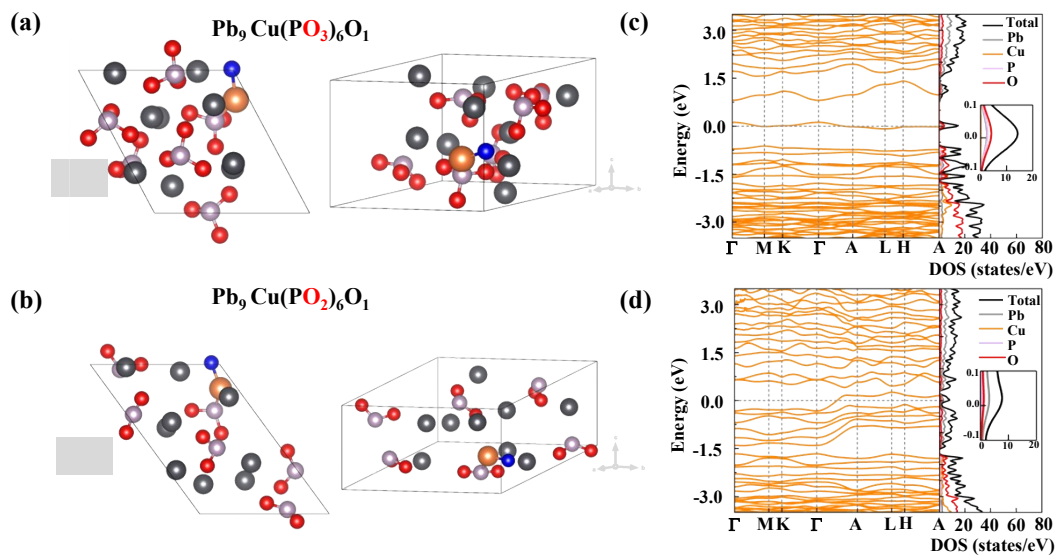

**FIG. S14.** (a-b) Top and side views of optimized  $\text{Pb}_9\text{Cu}(\text{PO}_x)_6\text{O}_1$  structures, where  $x=2,3$ . The Cu atom locate at site 2 and O atoms can be classified into two categories: O (blue sphere) and

O (red sphere). (c-d) The band structures and DOS for these structures, respectively. Insets show an amplification of the DOS contributions from various elements near the Fermi level. The lattice parameters of  $\text{Pb}_{10}(\text{PO}_x)_6\text{O}_y$  structures are shown in Table S4.

**Table S1.** Independent elastic constants of the  $\text{Pb}_{10}(\text{PO}_4)_y$ , in GPa.

| $\text{Pb}_{10}(\text{PO}_4)_y$         | $C_{11}$ | $C_{12}$ | $C_{22}$ | $C_{66}$ |
|-----------------------------------------|----------|----------|----------|----------|
| $\text{Pb}_{10}(\text{PO}_4)\text{O}_4$ | 82.15    | 31.84    | 82.15    | 23.63    |
| $\text{Pb}_{10}(\text{PO}_4)\text{O}_3$ | 78.48    | 18.85    | 78.55    | 26.21    |
| $\text{Pb}_{10}(\text{PO}_4)\text{O}_2$ | 82.14    | 21.66    | 82.14    | 25.85    |
| $\text{Pb}_{10}(\text{PO}_4)\text{O}_1$ | 82.32    | 28.46    | 82.32    | 14.82    |
| $\text{Pb}_{10}(\text{PO}_4)$           | 84.98    | 24.68    | 84.98    | 30.97    |

**Table S2.** The DFT relaxed lattice parameters  $a, b, c$  (in Å), space group and band gap (in eV) of  $\text{Pb}_9\text{Cu}(\text{PO}_4)_6\text{O}_4$ ,  $\text{Pb}_9\text{Cu}(\text{PO}_4)_6\text{O}_3$ ,  $\text{Pb}_9\text{Cu}(\text{PO}_4)_6\text{O}_2$ ,  $\text{Pb}_9\text{Cu}(\text{PO}_4)_6\text{O}_1$  and  $\text{Pb}_9\text{Cu}(\text{PO}_4)_6$ . The Cu atom locate at site 1.

| $\text{Pb}_9\text{Cu}(\text{PO}_4)_6\text{O}_x$ | $a$   | $b$   | $c$  | Space group | Band gap |
|-------------------------------------------------|-------|-------|------|-------------|----------|
| $\text{Pb}_9\text{Cu}(\text{PO}_4)_6\text{O}_4$ | 10.06 | 10.29 | 7.36 | P3          | Metal    |
| $\text{Pb}_9\text{Cu}(\text{PO}_4)_6\text{O}_3$ | 10.10 | 10.01 | 7.37 | P1          | Metal    |
| $\text{Pb}_9\text{Cu}(\text{PO}_4)_6\text{O}_2$ | 10.07 | 10.00 | 7.33 | P1          | Metal    |
| $\text{Pb}_9\text{Cu}(\text{PO}_4)_6\text{O}_1$ | 10.04 | 9.99  | 7.44 | $P6_3/m$    | Metal    |
| $\text{Pb}_9\text{Cu}(\text{PO}_4)_6$           | 9.94  | 9.94  | 7.29 | P1          | Metal    |

**Table S3.** The DFT relaxed lattice parameters  $a, b, c$  (in Å), space group and band gap (in eV) of  $\text{Pb}_9\text{Cu}(\text{PO}_4)_6\text{O}_4$ ,  $\text{Pb}_9\text{Cu}(\text{PO}_4)_6\text{O}_3$ ,  $\text{Pb}_9\text{Cu}(\text{PO}_4)_6\text{O}_2$ ,  $\text{Pb}_9\text{Cu}(\text{PO}_4)_6\text{O}_1$  and  $\text{Pb}_9\text{Cu}(\text{PO}_4)_6$ . The Cu atom locate at site 2.

| $\text{Pb}_9\text{Cu}(\text{PO}_4)_6\text{O}_x$ | $a$   | $b$   | $c$  | Space group | Band gap |
|-------------------------------------------------|-------|-------|------|-------------|----------|
| $\text{Pb}_9\text{Cu}(\text{PO}_4)_6\text{O}_4$ | 10.14 | 10.05 | 7.37 | Pm          | Metal    |
| $\text{Pb}_9\text{Cu}(\text{PO}_4)_6\text{O}_3$ | 9.38  | 9.82  | 7.80 | P1          | Metal    |
| $\text{Pb}_9\text{Cu}(\text{PO}_4)_6\text{O}_2$ | 9.97  | 9.90  | 7.31 | Pm          | Metal    |
| $\text{Pb}_9\text{Cu}(\text{PO}_4)_6\text{O}_1$ | 10.04 | 9.91  | 7.41 | P1          | Metal    |
| $\text{Pb}_9\text{Cu}(\text{PO}_4)_6$           | 9.92  | 9.86  | 7.35 | Pm          | Metal    |

**Table S4.** The DFT relaxed lattice parameters  $a, b, c$  (in Å), space group and band gap (in eV) of  $\text{Pb}_9\text{Cu}(\text{PO}_3)_6\text{O}_1$  and  $\text{Pb}_9\text{Cu}(\text{PO}_2)_6\text{O}_1$ . The Cu atom locate at site 1.

| $\text{Pb}_9\text{Cu}(\text{PO}_x)_6\text{O}_1$ | $a$  | $b$   | $c$  | Space group | Band gap |
|-------------------------------------------------|------|-------|------|-------------|----------|
| $\text{Pb}_9\text{Cu}(\text{PO}_3)_6\text{O}_1$ | 9.54 | 9.42  | 8.40 | P1          | Metal    |
| $\text{Pb}_9\text{Cu}(\text{PO}_2)_6\text{O}_1$ | 9.94 | 12.25 | 6.42 | P1          | Metal    |

**Table S5.** The DFT relaxed lattice parameters  $a, b, c$  (in Å), space group and band gap (in eV) of  $\text{Pb}_9\text{Cu}(\text{PO}_3)_6\text{O}_1$  and  $\text{Pb}_9\text{Cu}(\text{PO}_2)_6\text{O}_1$ . The Cu atom locate at site 2.

| $\text{Pb}_9\text{Cu}(\text{PO}_x)_6\text{O}_1$ | <i>a</i> | <i>b</i> | <i>c</i> | Space group | Band gap |
|-------------------------------------------------|----------|----------|----------|-------------|----------|
| $\text{Pb}_9\text{Cu}(\text{PO}_3)_6\text{O}_1$ | 9.38     | 9.82     | 7.80     | P1          | Metal    |
| $\text{Pb}_9\text{Cu}(\text{PO}_2)_6\text{O}_1$ | 9.45     | 12.87    | 6.55     | P1          | Metal    |

**Table S6. Comparisons of the model for  $\text{Pb}_{10}(\text{PO}_4)_6\text{O}_y$  in our work with those in reference.**

| Systems   | 4 defects                                 | 3 defects                                 | 2 defects                                 | 1 defect                                  | 0 defect                        |
|-----------|-------------------------------------------|-------------------------------------------|-------------------------------------------|-------------------------------------------|---------------------------------|
| reference | $\text{Pb}_{10}(\text{PO}_4)_6\text{O}_4$ | ×                                         | $\text{Pb}_{10}(\text{PO}_4)_6\text{O}_2$ | $\text{Pb}_{10}(\text{PO}_4)_6\text{O}_1$ | $\text{Pb}_{10}(\text{PO}_4)_6$ |
| our       | $\text{Pb}_{10}(\text{PO}_4)_6\text{O}_4$ | $\text{Pb}_{10}(\text{PO}_4)_6\text{O}_3$ | $\text{Pb}_{10}(\text{PO}_4)_6\text{O}_2$ | $\text{Pb}_{10}(\text{PO}_4)_6\text{O}_1$ | $\text{Pb}_{10}(\text{PO}_4)_6$ |

**Table S7** The atomic coordinates of  $\text{Pb}_{10}(\text{PO}_4)\text{O}_4$

| $\text{Pb}_{10}(\text{PO}_4)\text{O}_4$ |                     |                     |                     |
|-----------------------------------------|---------------------|---------------------|---------------------|
| $\text{Pb}_{10}(\text{PO}_4)\text{O}_4$ |                     |                     |                     |
| 1.0000000000000000                      |                     |                     |                     |
|                                         | 10.1632326335175058 | -0.0000064482819559 | 0.0000000544963192  |
|                                         | -5.0816219136161749 | 8.8016141093778213  | -0.0000000004171524 |
|                                         | 0.0000000414404380  | 0.0000000310067856  | 7.3693523112711965  |
| O                                       | Pb                  | P                   |                     |
| 28                                      | 10                  | 6                   |                     |
| Direct                                  | 0.5376538007480768  | 0.4110880513745584  | 0.2500000026295618  |
|                                         | 0.4623533480265030  | 0.5889167559126710  | 0.7499999913098213  |
|                                         | 0.5889119354908460  | 0.1265654156894023  | 0.2500000007348450  |
|                                         | 0.4110830221221238  | 0.8734364829498245  | 0.7500000084453610  |
|                                         | 0.8734346182058432  | 0.4623462395675920  | 0.2500000042293076  |
|                                         | 0.1265635161875970  | 0.5376467189841787  | 0.7499999881461548  |
|                                         | 0.5132020302156795  | 0.6502482125257474  | 0.2500000002100007  |
|                                         | 0.4868112187578105  | 0.3497591275475325  | 0.7499999996827491  |
|                                         | 0.3497512749657218  | 0.8629535227491661  | 0.2499999899115729  |
|                                         | 0.6502406028839707  | 0.1370522100233491  | 0.7500000073548406  |
|                                         | 0.1370465660452530  | 0.4867978509973986  | 0.2499999912703912  |
|                                         | 0.8629481240604330  | 0.5131882724572324  | 0.7500000132514375  |
|                                         | 0.0000000210724294  | 0.0000000306258577  | 0.1571638039154015  |
|                                         | 0.0000001652926198  | 0.0000001090517073  | 0.8428099697049236  |
|                                         | 0.0000001672857731  | 0.0000001217216215  | 0.6571900108167441  |
|                                         | 0.0000000118267493  | 0.0000000245649256  | 0.3428362323892183  |
|                                         | 0.7322041880157264  | 0.6426054998364233  | 0.0796450250617064  |
|                                         | 0.2678062053211804  | 0.3574029781148538  | 0.9203570095136652  |
|                                         | 0.3573948447246117  | 0.0895987749091295  | 0.0796449898680993  |
|                                         | 0.6425967608856663  | 0.9104033158806308  | 0.9203569832206345  |
|                                         | 0.9104012558294783  | 0.2677958722404337  | 0.0796450793309376  |
|                                         | 0.0895968295636664  | 0.7321938835836024  | 0.9203572841166278  |
|                                         | 0.2678062037541377  | 0.3574029864253510  | 0.5796429850894431  |
|                                         | 0.7322041847408564  | 0.6426054974983452  | 0.4203549778914497  |
|                                         | 0.6425967701877839  | 0.9104033311740580  | 0.5796430070736424  |
|                                         | 0.3573948436681439  | 0.0895987628295447  | 0.4203550260849600  |
|                                         | 0.0895968171184185  | 0.7321938892458753  | 0.5796427294450355  |
|                                         | 0.9104012656753903  | 0.2677958686118619  | 0.4203549140508109  |
|                                         | -0.0127094155663793 | 0.7362301959280715  | 0.2500000170174112  |
|                                         | 0.0127143836087041  | 0.2637803448845559  | 0.7499999670813760  |
|                                         | 0.2637699409065050  | 0.2510605734444517  | 0.2499999588377496  |
|                                         | 0.7362195576122809  | 0.7489345276362290  | 0.7500000100520564  |
|                                         | 0.7489398070676959  | 0.0127098044179449  | 0.2499999970322816  |

|                    |                     |                    |
|--------------------|---------------------|--------------------|
| 0.2510657961032051 | -0.0127146196700920 | 0.7499999996218492 |
| 0.6666666378817454 | 0.3333332482472973  | 0.9954136691342247 |
| 0.3333332548160765 | 0.6666667310347529  | 0.0045873019580646 |
| 0.3333332905780607 | 0.6666667357346328  | 0.4954126912064121 |
| 0.6666665848389627 | 0.3333332156856505  | 0.5045863452562894 |
| 0.6266952060059749 | 0.5909413961006809  | 0.2499999987402520 |
| 0.3733145595365471 | 0.4090655879844470  | 0.7499999977783693 |
| 0.4090587794017553 | 0.0357537319521369  | 0.2499999962453074 |
| 0.5909342526760726 | 0.9642489945672447  | 0.7500000045019787 |
| 0.9642464182549144 | 0.3733048969318792  | 0.2499999870969260 |
| 0.0357503226053890 | 0.6266847370272385  | 0.7500000166901186 |

**Table S8** The atomic coordinates of  $\text{Pb}_{10}(\text{PO}_4)_3\text{O}_3$

| $\text{Pb}_{10}(\text{PO}_4)_3\text{O}_3$ |                     |                     |                     |
|-------------------------------------------|---------------------|---------------------|---------------------|
| $\text{Pb}_{10}(\text{PO}_4)_3\text{O}_3$ |                     |                     |                     |
| 1.0000000000000000                        |                     |                     |                     |
|                                           | 9.9679046299673413  | 0.0002568371992084  | 0.0003054052922623  |
|                                           | -4.9837299171906135 | 8.6333296533916446  | -0.0002453755760438 |
|                                           | 0.0002290998302081  | -0.0000762867428765 | 7.4790584440984418  |
| O                                         | Pb                  | P                   |                     |
| 27                                        | 10                  | 6                   |                     |
| Direct                                    |                     |                     |                     |
|                                           | 0.7399468100324537  | 0.6419516587455454  | 0.1005251865958024  |
|                                           | 0.3580688407554396  | 0.0980230880804548  | 0.1005510513473862  |
|                                           | 0.9019939913501088  | 0.2600441977815829  | 0.1005168924783082  |
|                                           | 0.2668485498222675  | 0.3366897165711431  | 0.6099659124923392  |
|                                           | 0.6632775213678178  | 0.9301777171459586  | 0.6099157085335134  |
|                                           | 0.0697571427181560  | 0.7331265351574273  | 0.6100146844426857  |
|                                           | 0.2921474191401993  | 0.3730878286006005  | 0.9464973094567750  |
|                                           | 0.6269524174825596  | 0.9191065892645129  | 0.9464417109278541  |
|                                           | 0.0808911296478014  | 0.7077964599162212  | 0.9465277600534159  |
|                                           | 0.7410020822484522  | 0.6568412022441261  | 0.4334365324686945  |
|                                           | 0.3431871489723266  | 0.0842013606473177  | 0.4334521838372706  |
|                                           | 0.9157966567407374  | 0.2589661080930748  | 0.4334158482850509  |
|                                           | 0.5291527315618638  | 0.4208493517084832  | 0.2776580906668145  |
|                                           | 0.5286969530867969  | 0.6775376422604632  | 0.2597555068583544  |
|                                           | 0.5791645482670129  | 0.1082885837550777  | 0.2776654282529950  |
|                                           | 0.3224505112304403  | 0.8511908840506884  | 0.2597516485544223  |
|                                           | 0.8916459520826646  | 0.4708215132423735  | 0.2776698206554541  |
|                                           | 0.1487935294517863  | 0.4712542068678736  | 0.2597465393453806  |
|                                           | 0.4702911464977519  | 0.5931293844459202  | 0.7427182791884791  |
|                                           | 0.5013190506432723  | 0.3527213038283851  | 0.7665274173519523  |
|                                           | 0.4068316806130495  | 0.8771933117978269  | 0.7427499091507277  |
|                                           | 0.6472168399091012  | 0.1486058239795102  | 0.7665251809504661  |
|                                           | 0.1228266258204439  | 0.5296912483730678  | 0.7427151490386874  |
|                                           | 0.8513795080637768  | 0.4986279020949873  | 0.7665401407515157  |
|                                           | 0.0004413907848350  | 0.0001082654986747  | -0.0482809441334315 |
|                                           | 0.0000623063522883  | 0.0000282975159552  | 0.5893332412920662  |
|                                           | 0.0001320290393264  | 0.0000332105151561  | 0.1287849624654763  |
|                                           | -0.0040714520931104 | 0.7415500201030489  | 0.2496387332408538  |
|                                           | 0.2584214616896998  | 0.2544398827220151  | 0.2496295520299066  |
|                                           | 0.7456167036401823  | 0.0040359166958960  | 0.2495322413761257  |
|                                           | 0.0056961822695688  | 0.2176520405162903  | 0.7162846679184597  |
|                                           | 0.7823534808140008  | 0.7880613895355075  | 0.7162826745502714  |
|                                           | 0.2118866827760486  | -0.0057517583537432 | 0.7162137539025851  |
|                                           | 0.6666388480103353  | 0.3333211385547811  | 0.0083676529734845  |

|                    |                    |                    |
|--------------------|--------------------|--------------------|
| 0.3333534781521815 | 0.6666646152220799 | 0.5124037019154416 |
| 0.3332796174529897 | 0.6666413727391237 | 0.0077959712439843 |
| 0.6666505573518486 | 0.3333229075309165 | 0.5246763623971827 |
| 0.6315975773529167 | 0.6019668696022270 | 0.2656796669677984 |
| 0.3980397597108354 | 0.0296432942853975 | 0.2656794607280056 |
| 0.9703250706936773 | 0.3683714800780119 | 0.2656759925253617 |
| 0.3850347745691339 | 0.4130805878601049 | 0.7684003149935831 |
| 0.5869031278312208 | 0.9719831312217446 | 0.7683832814721764 |
| 0.0279999170957625 | 0.6149240205042121 | 0.7684348014563217 |

**Table S9** The atomic coordinates of  $\text{Pb}_{10}(\text{PO}_4)_2\text{O}_2$

| $\text{Pb}_{10}(\text{PO}_4)_2\text{O}_2$ |                     |                     |  |
|-------------------------------------------|---------------------|---------------------|--|
| $\text{Pb}_{10}(\text{PO}_4)_2\text{O}_2$ |                     |                     |  |
| $\text{Pb}_{10}(\text{PO}_4)_2\text{O}_2$ |                     |                     |  |
| 1.0000000000000000                        |                     |                     |  |
| 10.0386096916974754                       | -0.0000101477013340 | -0.0000000657730019 |  |
| -5.0193136373398826                       | 8.6936988674944313  | 0.0000002217860100  |  |
| -0.0000000424481938                       | 0.0000001644094089  | 7.3744742306568547  |  |
| O                                         | Pb                  | P                   |  |
| 26                                        | 10                  | 6                   |  |
| Direct                                    |                     |                     |  |
| 0.7249764103016706                        | 0.6470484223605053  | 0.0791293733007390  |  |
| 0.3529504785577042                        | 0.0779249429311346  | 0.0791303949660964  |  |
| 0.9220742648798416                        | 0.2750255038906902  | 0.0791300256003746  |  |
| 0.2621249478496412                        | 0.3547896564354711  | 0.5807951539951418  |  |
| 0.6452105823688414                        | 0.9073356552494130  | 0.5807951493602058  |  |
| 0.0926641611549054                        | 0.7378744234629688  | 0.5807951450059413  |  |
| 0.2621249371515503                        | 0.3547896020212690  | 0.9192048518484093  |  |
| 0.6452105770102018                        | 0.9073356558337011  | 0.9192048465467186  |  |
| 0.0926641737955906                        | 0.7378743999418300  | 0.9192048827406045  |  |
| 0.7249763747429916                        | 0.6470483399495505  | 0.4208706618244988  |  |
| 0.3529504358557904                        | 0.0779249064227282  | 0.4208696212181118  |  |
| 0.9220742703133522                        | 0.2750254898874895  | 0.4208699711164542  |  |
| 0.5361471190138295                        | 0.4080558345055337  | 0.2499999655181389  |  |
| 0.4991148812995709                        | 0.6432474149965788  | 0.2500000033513015  |  |
| 0.5919435821561937                        | 0.1280906172158580  | 0.2500000353316519  |  |
| 0.3567540460181821                        | 0.8558673935432968  | 0.2500000079987866  |  |
| 0.8719093674052074                        | 0.4638533138307396  | 0.2500000008889920  |  |
| 0.1441326299855273                        | 0.5008872444875295  | 0.2500000049208527  |  |
| 0.4742443208515549                        | 0.5806002729170874  | 0.7500000250589608  |  |
| 0.4704779618862977                        | 0.3232003136822383  | 0.7499999886380256  |  |
| 0.4193996355099481                        | 0.8936437530177794  | 0.7499999933543461  |  |
| 0.6767998656090666                        | 0.1472778531895900  | 0.7499999844494177  |  |
| 0.1063558207855092                        | 0.5257556075536218  | 0.7499999901427881  |  |
| 0.8527216521137712                        | 0.5295217182297721  | 0.7500000097814219  |  |
| -0.0000008319976233                       | 0.0000001698752887  | 0.1450755672396861  |  |
| -0.0000008665763780                       | 0.0000001508644875  | 0.3549244267966734  |  |
| -0.0108046065500724                       | 0.7608435445162574  | 0.2499999857279352  |  |
| 0.2391573929184613                        | 0.2283523153817785  | 0.2499999238995239  |  |
| 0.7716460441026014                        | 0.0108041525656819  | 0.2500000202674060  |  |
| 0.0086322687053449                        | 0.2629891151854094  | 0.7499999525902188  |  |
| 0.7370107357616357                        | 0.7456435319898574  | 0.7500000719005587  |  |
| 0.2543561954862872                        | -0.0086331110010163 | 0.7499999060646465  |  |
| 0.6666673373183566                        | 0.3333340979567029  | 0.0010555770180093  |  |
| 0.3333329863807435                        | 0.6666668816131190  | 0.4919920827832692  |  |
| 0.3333329626155449                        | 0.6666669573829048  | 0.0080079544838125  |  |
| 0.6666673794586701                        | 0.3333342606897632  | 0.4989444246473552  |  |

|                    |                    |                    |
|--------------------|--------------------|--------------------|
| 0.6189961392864159 | 0.5885367826043226 | 0.2499999989660118 |
| 0.4114628446787798 | 0.0304576057908985 | 0.2500000138111393 |
| 0.9695420460532849 | 0.3810054504962698 | 0.2500000019380375 |
| 0.3694326297407632 | 0.3993262342812938 | 0.7500000092776586 |
| 0.6006741093182292 | 0.9701066780623308 | 0.7499999932529958 |
| 0.0298930376822367 | 0.6305671471882960 | 0.7500000063770828 |

**Table S10** The atomic coordinates of  $\text{Pb}_{10}(\text{PO}_4)\text{O}_1$

| $\text{Pb}_{10}(\text{PO}_4)\text{O}_1$ |                     |                     |                    |
|-----------------------------------------|---------------------|---------------------|--------------------|
| $\text{Pb}_{10}(\text{PO}_4)\text{O}_1$ |                     |                     |                    |
| 1.0000000000000000                      |                     |                     |                    |
|                                         | 10.0700786950221826 | -0.0000042023678023 | 0.0000001229946036 |
|                                         | -5.0350429877804030 | 8.7209413320273121  | 0.0000000278614617 |
|                                         | 0.0000000503006751  | 0.0000001235533185  | 7.4131082458126505 |
| Pb                                      | P                   | O                   |                    |
| 10                                      | 6                   | 25                  |                    |
| Direct                                  |                     |                     |                    |
|                                         | 1.0011813404322742  | 0.7735333864573776  | 0.2468813113766664 |
|                                         | -0.0013531660844832 | 0.2729993672608842  | 0.7474709263295538 |
|                                         | 0.2264668022866196  | 0.2276479875007036  | 0.2468808269067766 |
|                                         | 0.7270005710407329  | 0.7256473512045157  | 0.7474711833425722 |
|                                         | 0.7723523637029023  | -0.0011811632962841 | 0.2468809010853514 |
|                                         | 0.2743526727675784  | 1.0013529679749436  | 0.7474712206580582 |
|                                         | 0.6666665270529833  | 0.3333333013961371  | 0.0058555227086033 |
|                                         | 0.3333330832072720  | 0.6666665020100664  | 0.0071701061757470 |
|                                         | 0.3333338054503294  | 0.6666666968970630  | 0.4876727266217928 |
|                                         | 0.6666666048969486  | 0.3333330156625853  | 0.4918458711790679 |
|                                         | 0.6261039160663564  | 0.5965308531692133  | 0.2480666669588271 |
|                                         | 0.3594292124595316  | 0.3891589913712749  | 0.7478080366168091 |
|                                         | 0.4034692006868761  | 0.0295729129122589  | 0.2480666477231315 |
|                                         | 0.6108409734813026  | 0.9702702747774382  | 0.7478080958179306 |
|                                         | 0.9704271006191504  | 0.3738961549161092  | 0.2480665893706787 |
|                                         | 0.0297295934395709  | 0.6405705194181269  | 0.7478082024918649 |
|                                         | 0.5023796026195668  | 0.6459513179851305  | 0.2474987760619894 |
|                                         | 0.4692380639271800  | 0.3231323725146252  | 0.7482974099327397 |
|                                         | 0.3540484436725539  | 0.8564280456430468  | 0.2474987525865240 |
|                                         | 0.6768676937846494  | 0.1461056110049281  | 0.7482973880528203 |
|                                         | 0.1435718907602743  | 0.4976204457948324  | 0.2474988089664377 |
|                                         | 0.8538943751590451  | 0.5307618692473771  | 0.7482975645915731 |
|                                         | 0.7327383989115014  | 0.6594860607296016  | 0.0786506517291561 |
|                                         | 0.2522911326128597  | 0.3404738316737433  | 0.9164239217874731 |
|                                         | 0.3405140833629775  | 0.0732523257857783  | 0.0786507212179371 |
|                                         | 0.6595261729559332  | 0.9118172314647476  | 0.9164239114872246 |
|                                         | 0.9267478281685002  | 0.2672615715948480  | 0.0786506127401277 |
|                                         | 0.0881829269798597  | 0.7477086863597564  | 0.9164242363366010 |
|                                         | 0.2511749869820299  | 0.3384484661592507  | 0.5802119766205541 |
|                                         | 0.7332116670733865  | 0.6611054756229422  | 0.4168629424146322 |
|                                         | 0.6615514386926599  | 0.9127264022662245  | 0.5802118858230578 |
|                                         | 0.3388948144610867  | 0.0721062050451762  | 0.4168630704726724 |
|                                         | 0.0872734304491643  | 0.7488252304722821  | 0.5802122209420109 |
|                                         | 0.9278938059043046  | 0.2667883092796414  | 0.4168629255228800 |
|                                         | 0.5473026770545176  | 0.4170121005356930  | 0.2491308838713073 |
|                                         | 0.4592684150892850  | 0.5712308047413625  | 0.7464322465419021 |
|                                         | 0.5829879257857562  | 0.1302904482012452  | 0.2491307762836777 |
|                                         | 0.4287691427310589  | 0.8880373797123693  | 0.7464323537930370 |
|                                         | 0.8697095050080250  | 0.4526971825368758  | 0.2491307629673749 |

|                    |                     |                    |
|--------------------|---------------------|--------------------|
| 0.1119624327939822 | 0.5407316175074578  | 0.7464320541587580 |
| 0.0000001175539137 | -0.0000000105113407 | 0.2429413737340713 |

**Table S11** The atomic coordinates of  $\text{Pb}_{10}(\text{PO}_4)$

|                               |                     |                    |  | $\text{Pb}_{10}(\text{PO}_4)$ |                     |  |
|-------------------------------|---------------------|--------------------|--|-------------------------------|---------------------|--|
| $\text{Pb}_{10}(\text{PO}_4)$ |                     |                    |  |                               |                     |  |
| 1.0000000000000000            |                     |                    |  |                               |                     |  |
| 9.9381780979117149            |                     |                    |  | -0.0000077840445691           | 0.0000000043035612  |  |
| -4.9690957910867191           |                     |                    |  | 8.6067060248142546            | -0.0000000148535454 |  |
| 0.0000000072142699            |                     |                    |  | -0.0000000070985151           | 7.3627069250793991  |  |
| O                             | Pb                  | P                  |  |                               |                     |  |
| 24                            | 10                  | 6                  |  |                               |                     |  |
| Direct                        |                     |                    |  |                               |                     |  |
| 0.5321163069521074            | 0.4163980999561624  | 0.2499999943951285 |  |                               |                     |  |
| 0.4678777671369406            | 0.5836005241415161  | 0.7499999915166747 |  |                               |                     |  |
| 0.5836040356735793            | 0.1157187670912882  | 0.2500000064641707 |  |                               |                     |  |
| 0.4163972321386151            | 0.8842766413162193  | 0.7499999877056726 |  |                               |                     |  |
| 0.8842814090678804            | 0.4678851301708971  | 0.2499999945142725 |  |                               |                     |  |
| 0.1157232198793351            | 0.5321207230309309  | 0.7499999909206870 |  |                               |                     |  |
| 0.5191349936160125            | 0.6680208681307578  | 0.2500000034173832 |  |                               |                     |  |
| 0.4808672811759781            | 0.3319825838357363  | 0.7499999924307567 |  |                               |                     |  |
| 0.3319789706788125            | 0.8511123604849189  | 0.2499999945298750 |  |                               |                     |  |
| 0.6680176521832150            | 0.1488865750425911  | 0.7500000004802568 |  |                               |                     |  |
| 0.1488880860969758            | 0.4808667565190496  | 0.2499999908797752 |  |                               |                     |  |
| 0.8511129721792963            | 0.5191309209234646  | 0.7500000031018641 |  |                               |                     |  |
| 0.7371239805556327            | 0.6516861246524447  | 0.0797876021617922 |  |                               |                     |  |
| 0.2628753658227422            | 0.3483106825927844  | 0.9202130741146838 |  |                               |                     |  |
| 0.3483137726862371            | 0.0854372442382719  | 0.0797862109001162 |  |                               |                     |  |
| 0.6516894951094143            | 0.9145652646785186  | 0.9202146122159752 |  |                               |                     |  |
| 0.9145629076048687            | 0.2628769097774766  | 0.0797863688268021 |  |                               |                     |  |
| 0.0854346244358351            | 0.7371238728183658  | 0.9202144845601629 |  |                               |                     |  |
| 0.2628753591926210            | 0.3483106816599425  | 0.5797869223046057 |  |                               |                     |  |
| 0.7371239594562117            | 0.6516860989885884  | 0.4202124165503737 |  |                               |                     |  |
| 0.6516895139342667            | 0.9145652703056991  | 0.5797853931963022 |  |                               |                     |  |
| 0.3483137666427655            | 0.0854372289262822  | 0.4202138044645812 |  |                               |                     |  |
| 0.0854346254464284            | 0.7371238911475185  | 0.5797855291802653 |  |                               |                     |  |
| 0.9145629104788703            | 0.2628769226778659  | 0.4202136371726862 |  |                               |                     |  |
| -0.0058931813035805           | 0.7576124742939822  | 0.2500000024258642 |  |                               |                     |  |
| 0.0058914836975082            | 0.2423765027120451  | 0.7499999899389492 |  |                               |                     |  |
| 0.2423872106275766            | 0.2364939221766372  | 0.2500000296402647 |  |                               |                     |  |
| 0.7576238509368268            | 0.7635154256720482  | 0.7499999724005313 |  |                               |                     |  |
| 0.7635051628583285            | 0.0058925981591443  | 0.2500000040343938 |  |                               |                     |  |
| 0.2364855127073018            | -0.0058908770964822 | 0.7499999952925802 |  |                               |                     |  |
| 0.6666665415857006            | 0.3333336932638853  | 0.9972650026589450 |  |                               |                     |  |
| 0.3333334730441992            | 0.6666663237500475  | 0.0027294084119015 |  |                               |                     |  |
| 0.3333334465838164            | 0.6666663061995495  | 0.4972705666536753 |  |                               |                     |  |
| 0.6666665848230121            | 0.3333337301124368  | 0.5027350132390715 |  |                               |                     |  |
| 0.6281572160652075            | 0.5986275511093133  | 0.2500000036317371 |  |                               |                     |  |
| 0.3718418524564627            | 0.4013722375322312  | 0.7499999935591324 |  |                               |                     |  |
| 0.4013728631026168            | 0.0295274193493360  | 0.2500000012513802 |  |                               |                     |  |
| 0.5986273961441650            | 0.9704719413456400  | 0.7499999980764822 |  |                               |                     |  |
| 0.9704717982703724            | 0.3718447591048072  | 0.2499999903844418 |  |                               |                     |  |
| 0.0295288812558670            | 0.6281561502081102  | 0.7500000053957957 |  |                               |                     |  |

**Table S12** The atomic coordinates of  $\text{Pb}_{10}(\text{PO}_3)\text{O}_1$ .

| $\text{Pb}_{10}(\text{PO}_3)\text{O}_1$ |                     |                     |                     |
|-----------------------------------------|---------------------|---------------------|---------------------|
| $\text{Pb}_{10}(\text{PO}_3)\text{O}_1$ |                     |                     |                     |
| 1.0000000000000000                      |                     |                     |                     |
|                                         | 9.6931230972691083  | 0.0000692507290825  | 0.0000484312672035  |
|                                         | -4.8465016420861486 | 8.3943926170055700  | -0.0000500910756204 |
|                                         | 0.0000397646976157  | -0.0000252675802573 | 8.0008840558310172  |
| Pb                                      | P                   | O                   |                     |
| 10                                      | 6                   | 19                  |                     |
| Direct                                  |                     |                     |                     |
|                                         | 0.9910665096471610  | 0.7752210194121623  | 0.3034935364476817  |
|                                         | 0.0066725486082897  | 0.2555162145076822  | 0.7803627430863178  |
|                                         | 0.2247795785921813  | 0.2158467046977616  | 0.3034969582283717  |
|                                         | 0.7444762642923036  | 0.7511559225670130  | 0.7803692456738954  |
|                                         | 0.7841547646827910  | 0.0089301981661304  | 0.3034941534640868  |
|                                         | 0.2488411552886927  | 0.9933287797141537  | 0.7803836724579659  |
|                                         | 0.6666675686185797  | 0.3333339138950077  | 0.0275043127848119  |
|                                         | 0.3333321513428426  | 0.6666654766848604  | 0.0236835024625213  |
|                                         | 0.3333276616627351  | 0.6666687748015614  | 0.4839697375755836  |
|                                         | 0.6666629812820756  | 0.3333332106279551  | 0.5102098922523856  |
|                                         | 0.6420622471634871  | 0.6133915672020654  | 0.2287369305455716  |
|                                         | 0.3571524182285472  | 0.3877986254094751  | 0.7255626025507310  |
|                                         | 0.3866182453165599  | 0.0286761608694943  | 0.2287478098370169  |
|                                         | 0.6121941865392274  | 0.9693588248208171  | 0.7255586879396266  |
|                                         | 0.9713327337751991  | 0.3579400972128933  | 0.2287353514379372  |
|                                         | 0.0306368696303110  | 0.6428424682414040  | 0.7255565333887608  |
|                                         | 0.5153884543911753  | 0.6721353514489234  | 0.2295578224366178  |
|                                         | 0.4556337589397627  | 0.2971697359723119  | 0.7169453014926599  |
|                                         | 0.3278693042436275  | 0.8432518166406658  | 0.2295728197455832  |
|                                         | 0.7028303314613851  | 0.1584688457845886  | 0.7169410858016644  |
|                                         | 0.1567430595295946  | 0.4846075631611328  | 0.2295634464992059  |
|                                         | 0.8415328071184249  | 0.5443676483928276  | 0.7169421275890673  |
|                                         | 0.7083041349827299  | 0.6322379643030038  | 0.0417463546595687  |
|                                         | 0.3677623712237675  | 0.0760598359863293  | 0.0417590519023715  |
|                                         | 0.9239416044131444  | 0.2917019554490854  | 0.0417440179954229  |
|                                         | 0.2758857282909771  | 0.3694321931353126  | 0.5460356625312497  |
|                                         | 0.6305692856369471  | 0.9064492526846093  | 0.5460395542156847  |
|                                         | 0.0935473678625093  | 0.7241233736047914  | 0.5460372354553393  |
|                                         | 0.5503478647468184  | 0.4261587044658429  | 0.2573546675276860  |
|                                         | 0.4797231271081444  | 0.5760757851290432  | 0.7357349913963311  |
|                                         | 0.5738489954337934  | 0.1241883258893302  | 0.2573588251746320  |
|                                         | 0.4239170868251872  | 0.9036589159595212  | 0.7357111314987508  |
|                                         | 0.8758123748803436  | 0.4496540654132241  | 0.2573559344107619  |
|                                         | 0.0963453321756043  | 0.5202692907946989  | 0.7357157936734107  |
|                                         | -0.0000008239349047 | 0.0000013409543490  | 0.4161481718607722  |

**Table S13** The atomic coordinates of  $\text{Pb}_{10}(\text{PO}_2)\text{O}_1$ .

| $\text{Pb}_{10}(\text{PO}_2)\text{O}_1$ |                     |                     |                     |
|-----------------------------------------|---------------------|---------------------|---------------------|
| $\text{Pb}_{10}(\text{PO}_2)\text{O}_1$ |                     |                     |                     |
| 1.0000000000000000                      |                     |                     |                     |
|                                         | 10.5507274032445437 | -0.9214218856769248 | -0.2395466777477675 |
|                                         | -6.0774121610976364 | 10.2637955269156382 | -0.1621551361626862 |
|                                         | -0.2165961455567244 | -0.1538217001495218 | 6.3498447087076313  |
| Pb                                      | P                   | O                   |                     |
| 10                                      | 6                   | 13                  |                     |



---

Direct

|                     |                     |                    |
|---------------------|---------------------|--------------------|
| 0.9096133706874568  | 0.8058707812454312  | 0.2019278045937939 |
| 0.0824566615371072  | 0.3125089612686123  | 0.8034218894125267 |
| 0.2063317463779799  | 0.2356878867843429  | 0.2126267517324748 |
| 0.7468404435422159  | 0.6994352705530811  | 0.6755096332301759 |
| 0.7161076758405041  | -0.0101758214844867 | 0.2000650329873760 |
| 0.3304563564587790  | 1.0008012200403484  | 0.7093028494670326 |
| 0.6656750860444741  | 0.3137242038614260  | 0.0795781491550077 |
| 0.2404524380263177  | 0.6207631525148729  | 0.0895225328679266 |
| 0.2581264689459489  | 0.6390838669428981  | 0.5821218250953120 |
| 0.6845550607947873  | 0.3272257726447917  | 0.5688826331661679 |
| 0.5923897308829267  | 0.6273689735444542  | 0.1416160164910528 |
| 0.3601680327841320  | 0.3567968512756610  | 0.6343922703303145 |
| 0.3528587171193520  | 0.0202579267543214  | 0.1781900106540791 |
| 0.6539152904436144  | 0.9697280269948065  | 0.7139020149247639 |
| 1.0063563487616782  | 0.3339305515515623  | 0.3173824187731238 |
| 0.0388466960894430  | 0.6814410946505252  | 0.8355907897600032 |
| 0.5125297793263150  | 0.7022866030624673  | 0.1284059968022846 |
| 0.8798150549167226  | 0.5417356255223915  | 0.7797001963814919 |
| 0.3661082915630804  | 0.1598485816021825  | 0.1332022951665537 |
| 0.8571674232051295  | 0.2375676538654077  | 0.1581768357199863 |
| 0.3289360400296504  | 0.4706109102094121  | 0.6116941217131242 |
| 0.6549045219773971  | 0.8409875776192970  | 0.6637636374474483 |
| 0.1039514701660038  | 0.7638468610991829  | 0.6310735549710810 |
| 0.4889055159745601  | 0.4713534768694252  | 0.1285756556833117 |
| 0.5421058312605619  | 0.4345380068203126  | 0.6485755273576229 |
| 0.5314611401267327  | 0.0737711276366300  | 0.1888676910522868 |
| 0.4765326227972261  | 0.9166535818166626  | 0.6851174110769744 |
| 0.9829007426443949  | 0.4365015017097469  | 0.4352641707091754 |
| -0.0528685003245187 | 0.0101998030242202  | 0.2032600822775953 |

---
